# Supplementary material
Source: bioRxiv or medRxiv preprint supplement (https://www.biorxiv.org/highwire/filestream/122081/field_highwire_adjunct_files/0/402487-1.pdf)
Supplement: Supplementary file [file 402487-1.pdf]

## Supplementary Table 1

Inclusion of original SITG categories (see main text) within new aggregated land cover variables (see column headers)

| <b>Managed vegetation</b>           | <b>Water vegetation</b>  | <b>Forests</b>                       | <b>Urban environment</b> | <b>Open fields</b>         |
|-------------------------------------|--------------------------|--------------------------------------|--------------------------|----------------------------|
| Gazons - Massifs entretenus         | Eaux calmes              | Pinèdes ouvertes                     | Autres surfaces dures    | Prairies sèches            |
| Bosquets urbains                    | Végétations des rivages  | Hêtraies                             | Glariers nus             | Milieux herbacés intensifs |
| Plantations d'arbres                | Roselières               | Autres forêts                        | Sols et substrats nus    | Milieux herbacés extensifs |
| Pépinières                          | Bas marais               | Chênaies                             | Gravières                | Rudérales - Jachères       |
| Vergers                             | Forêts inondables        | Lisières - Régénérations forestières | Routes - Bâtiments       |                            |
| Grandes cultures et flore adventice | Eaux calmes végétalisées | Buissons - Ronciers                  | Voies ferrées            |                            |
| Cultures maraîchères - Potagers     |                          | Saulaies buissonnantes               |                          |                            |
| Vignes                              |                          |                                      |                          |                            |
| Arbres isolés - Alignements         |                          |                                      |                          |                            |

## Supplementary Figure 1

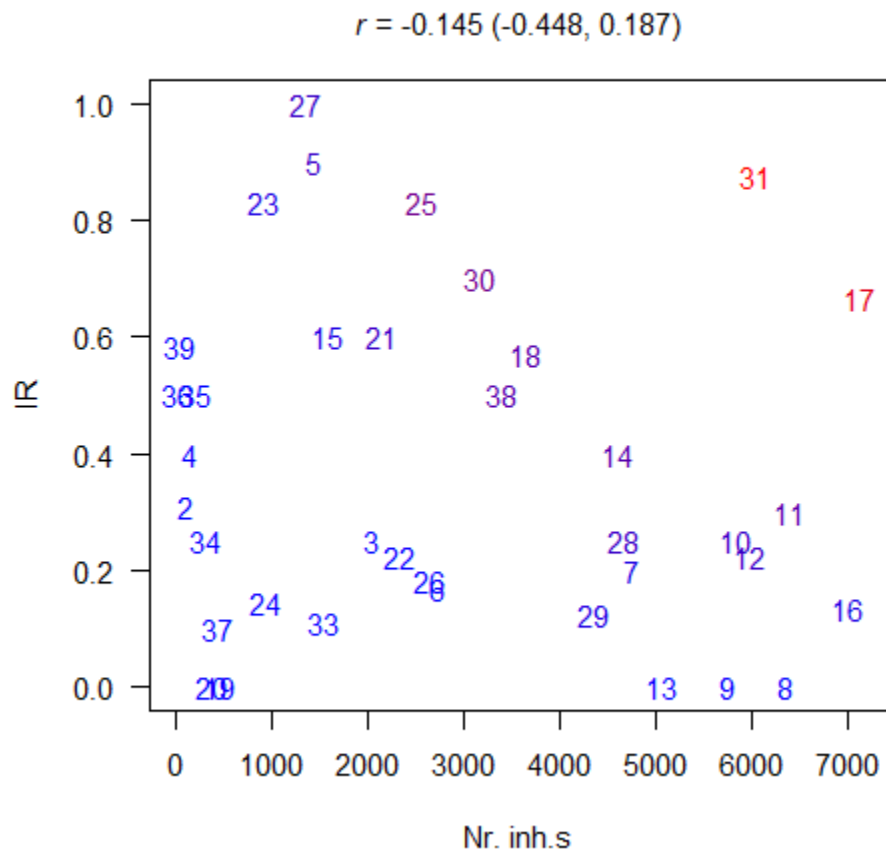

The relationship between infection rate (IR) and number of inhabitants/3.14 km<sup>2</sup> (Nr. inh.s) is plotted for each pond. Pond IDs are reported, and coloured according to the combination of IR and Nr. inh.s values they present: red numbers correspond to high values in both variables.
